# Supplementary figures and images for: Fractionated Radiation Therapy Stimulates Antitumor Immunity Mediated by Both Resident and Infiltrating Polyclonal T-cell Populations when Combined with PD-1 Blockade
Source: Oxford University Press journal article supplement (doi:10.1158/1078-0432.ccr-16-1673), 2017-05-22

**A**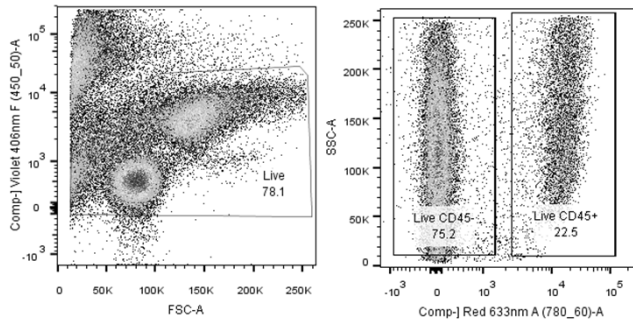**B**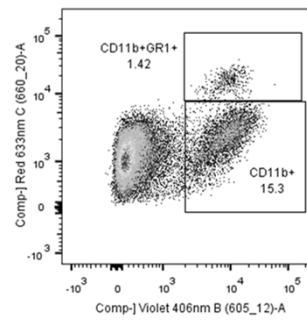**C**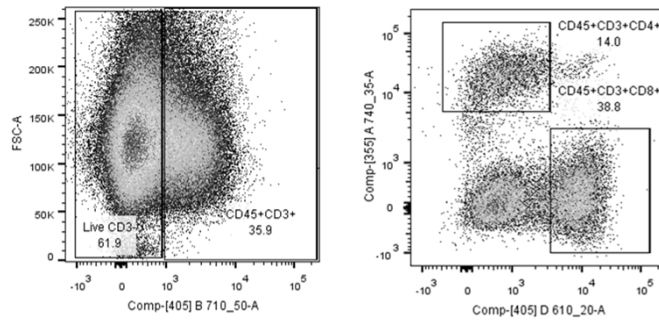

Supplemental Figure 1.

Supplement: 10780432ccr161673-sup-168558_3_unknown_upload_4001326_ccyx3c.pdf [file 10780432ccr161673-sup-168558_3_unknown_upload_4001326_ccyx3c.pdf]
